# Supplementary material
Source: PubMed Central journal article supplement (PMC3784008)
Supplement: NIHMS511486-supplement-supplementary_data.pdf [file NIHMS511486-supplement-supplementary_data.pdf]

Supplementary Fig. 1

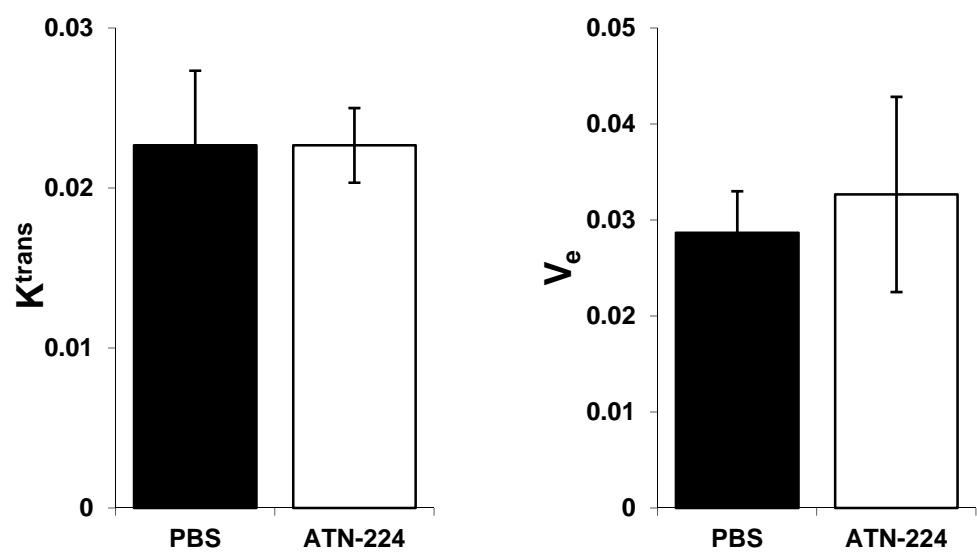

Supplementary Fig. 2

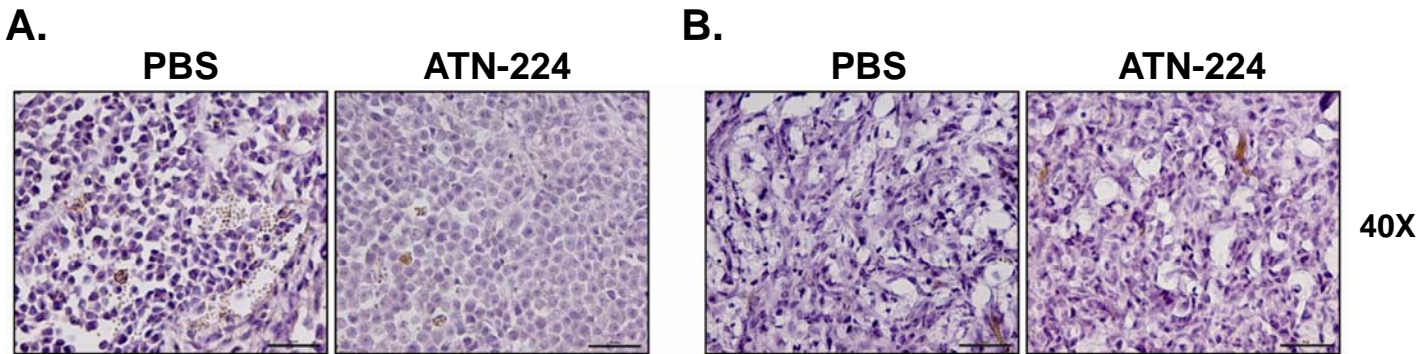

## Supplementary Fig.3

A.

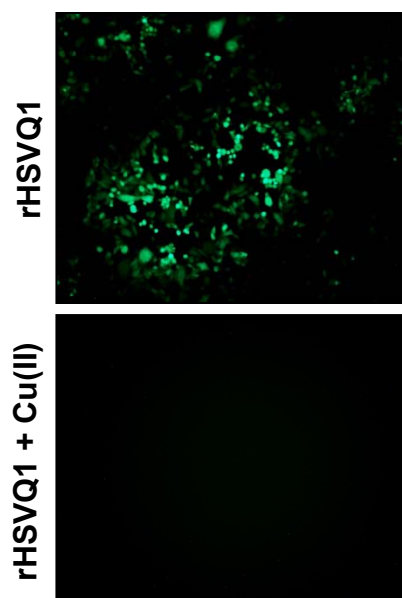

B.

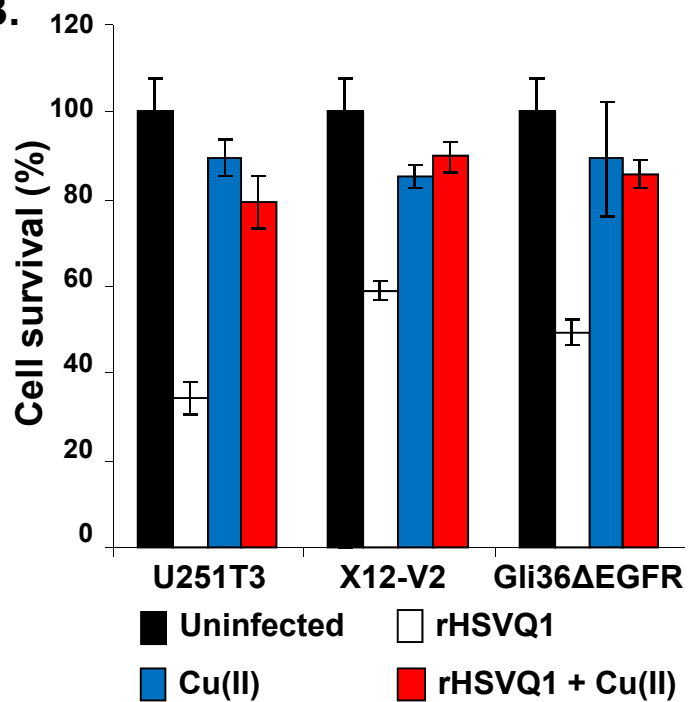

Supplementary Fig.4

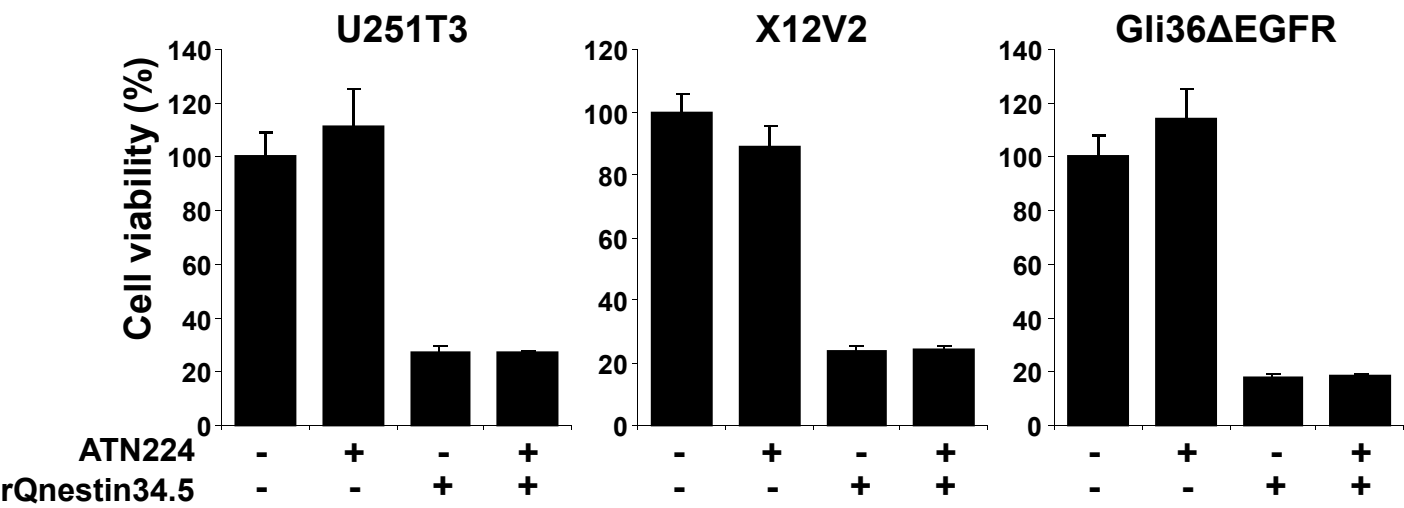

**Supplementary Fig. 5**

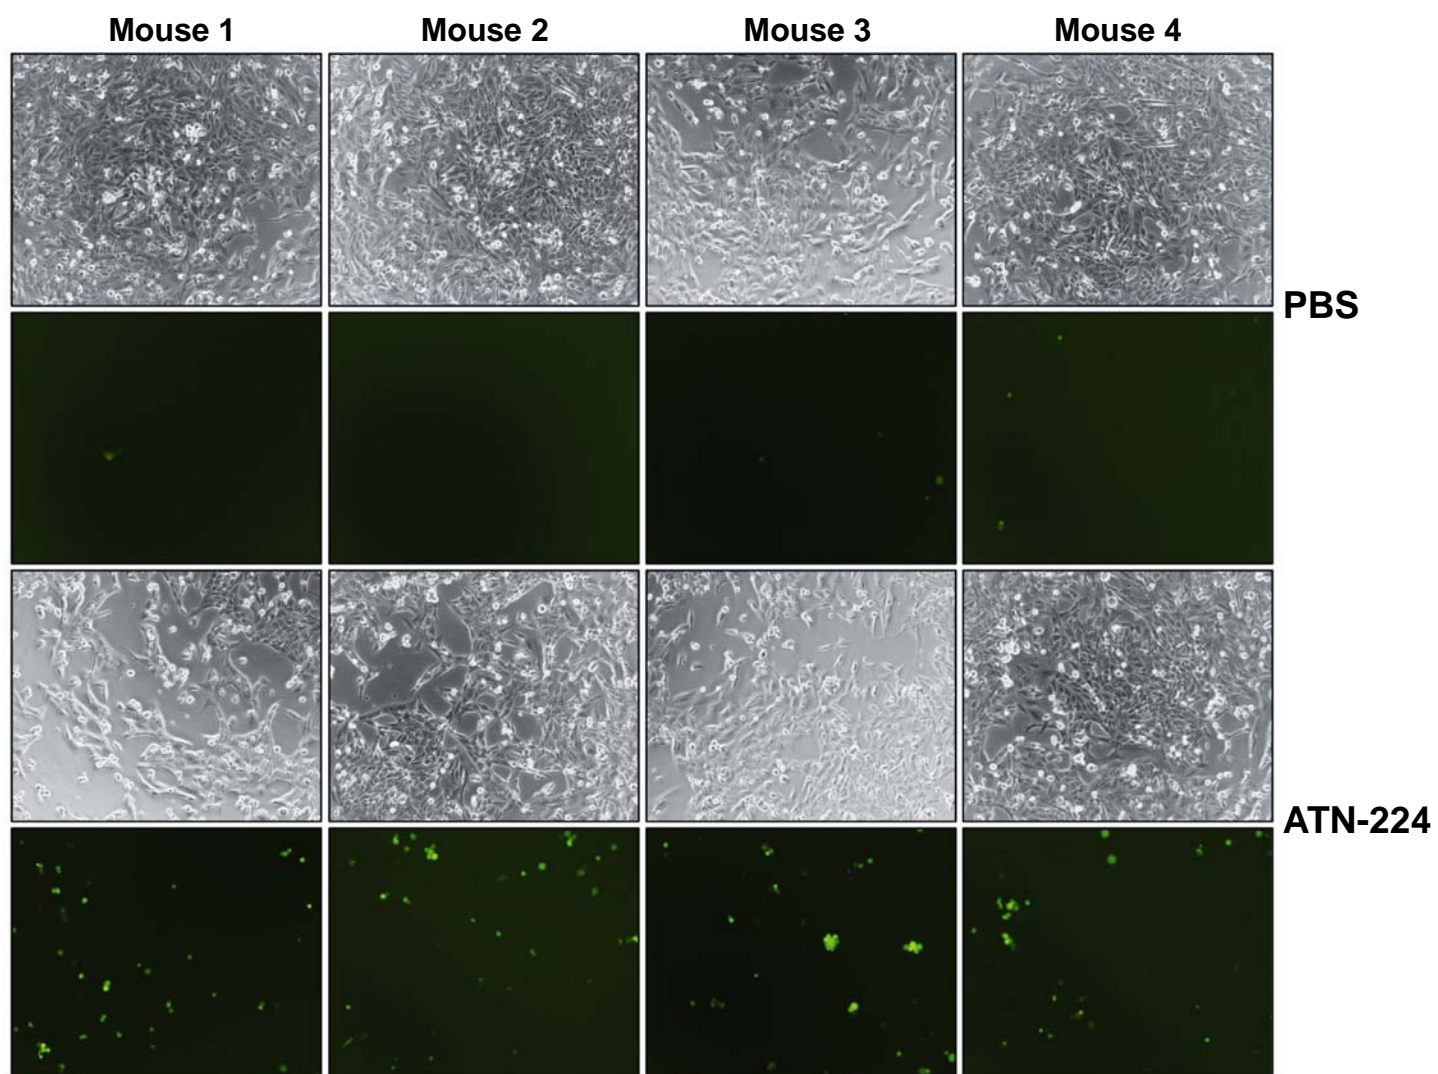

**Supplementary Figure S1.**

Quantification of color coded  $K_{trans}$  and  $v_e$  parametric images following DCE-MRI. Mice bearing U87ΔEGFR intracranial tumors were treated with either PBS or ATN-224 (0.7mg) for thirteen days by daily gavage.

**Supplementary Figure S2.**

HSV-1-stained sections of subcutaneous and intracranial tumors treated with PBS or ATN-224 (0.7mg) by daily gavage. Representative photomicrographs for each treatment group are shown. Original magnification,  $\times 40$  A) U251T3 subcutaneous tumor B) U87ΔEGFR intracranial tumor.

**Supplementary Figure S3.**

Effect of copper on virus therapy for glioma cells. Gli36ΔEGFR glioma cells were infected with rHSVQ (MOI=0.1), incubated with buffer  $\pm$  Copper (1 mg/L). A) Fluorescence microscopic images of GFP positive Gli36ΔEGFR glioma cells. B) Cell survival of U251T3, X12-V2 and Gli36 ΔEGFR was measured by a standard crystal violet assay 48 hrs post infection. (\* =  $P < 0.05$ ).

**Supplementary Figure S4.**

ATN-224 by itself does not effect glioma cell viability or oHSV efficacy in the absence of copper. The indicated glioma cells were treated with ATN-224 or PBS in the presence or absence of rQnestin34.5, and their viability was measured by a standard crystal violet assay.

**Supplementary Figure S5.**

Ex vivo serum rescue assay. Serum from mice fed PBS or ATN-224 (0.7 mg/day (n=4) by daily gavage) was collected on day 10, incubated with rQnestin34.5 for 30 min at 37 °C, and plated on Vero cells for 3 days. Phase contrast and fluorescent microscopy images indicate GFP positive cells, magnification,  $\times 10$ .
