# Supplementary material
Source: PubMed Central journal article supplement (PMC3784008)
Supplement: NIHMS511486-supplement-tables.pdf [file NIHMS511486-supplement-tables.pdf]

## Supplementary Table 1.

|              | Strain | Engineered mutations                                                                                                                                      |
|--------------|--------|-----------------------------------------------------------------------------------------------------------------------------------------------------------|
| hrR3         | KOS    | 1. Wild type of both $\gamma$ 34.5 copies<br>2. LacZ insertion in UL39 (ICP6-inactivation)                                                                |
| rHSVQ        | F      | 1. Deletion of both $\gamma$ 34.5 copies<br>2. GFP insertion in UL39 (ICP6-inactivation)                                                                  |
| rQnestin34.5 | F      | 1. Deletion of both $\gamma$ 34.5 copies<br>2. Re-insertion of $\gamma$ 34.5 regulated by nestin promoter<br>2. GFP insertion in UL39 (ICP6-inactivation) |
